# Supplementary material
Source: PubMed Central journal article supplement (PMC3085719)

**Manuscript Title**

Fetal exposure to chlordane and permethrin mixtures in relation to inflammatory cytokines and birth outcomes

**Authors**

Gila Neta, Lynn R. Goldman, Dana Barr, Benjamin J. Apelberg, Frank R. Witter, Rolf U. Halden

**Supporting Information**

Pages: 7

Table S1 (page S2)

Table S2 (page S3)

Figure S1 (pages S4-S5)

Figure S2 (pages S6-S7)

Table S1: Demographic characteristics of the THREE study population (2004-2005) in comparison with the Johns Hopkins Hospital Labor and Delivery Suite population (2001) and the state of Maryland (2001).

| <b>Characteristics</b>       | <b>THREE (%)</b> | <b>JHH (%)</b> | <b>Maryland (%)</b> |
|------------------------------|------------------|----------------|---------------------|
| African-American             | 68.9             | 70.2           | 33.0                |
| Maternal age <18             | 8.5              | 9.3            | 3.6                 |
| Maternal education <12 yrs   | 29.1             | 32.0           | 13.3                |
| Births to unmarried women    | 66.0             | 64.4           | 34.6                |
| Late or no prenatal care     | 9.1              | 9.8            | 3.3                 |
| Parity 4+                    | 5.9              | 17.7           | 10.2                |
| Plural births                | 0.0              | 4.9            | 3.6                 |
| Low birth weight (<2500 g)   | 12.3             | 20.5           | 8.9                 |
| Premature births (<37 weeks) | 14.7             | 23.5           | 10.9                |



Figure S1: Unadjusted and adjusted linear predictions for gestational age, birth weight and birth size parameters with normalized chlordane and permethrin components

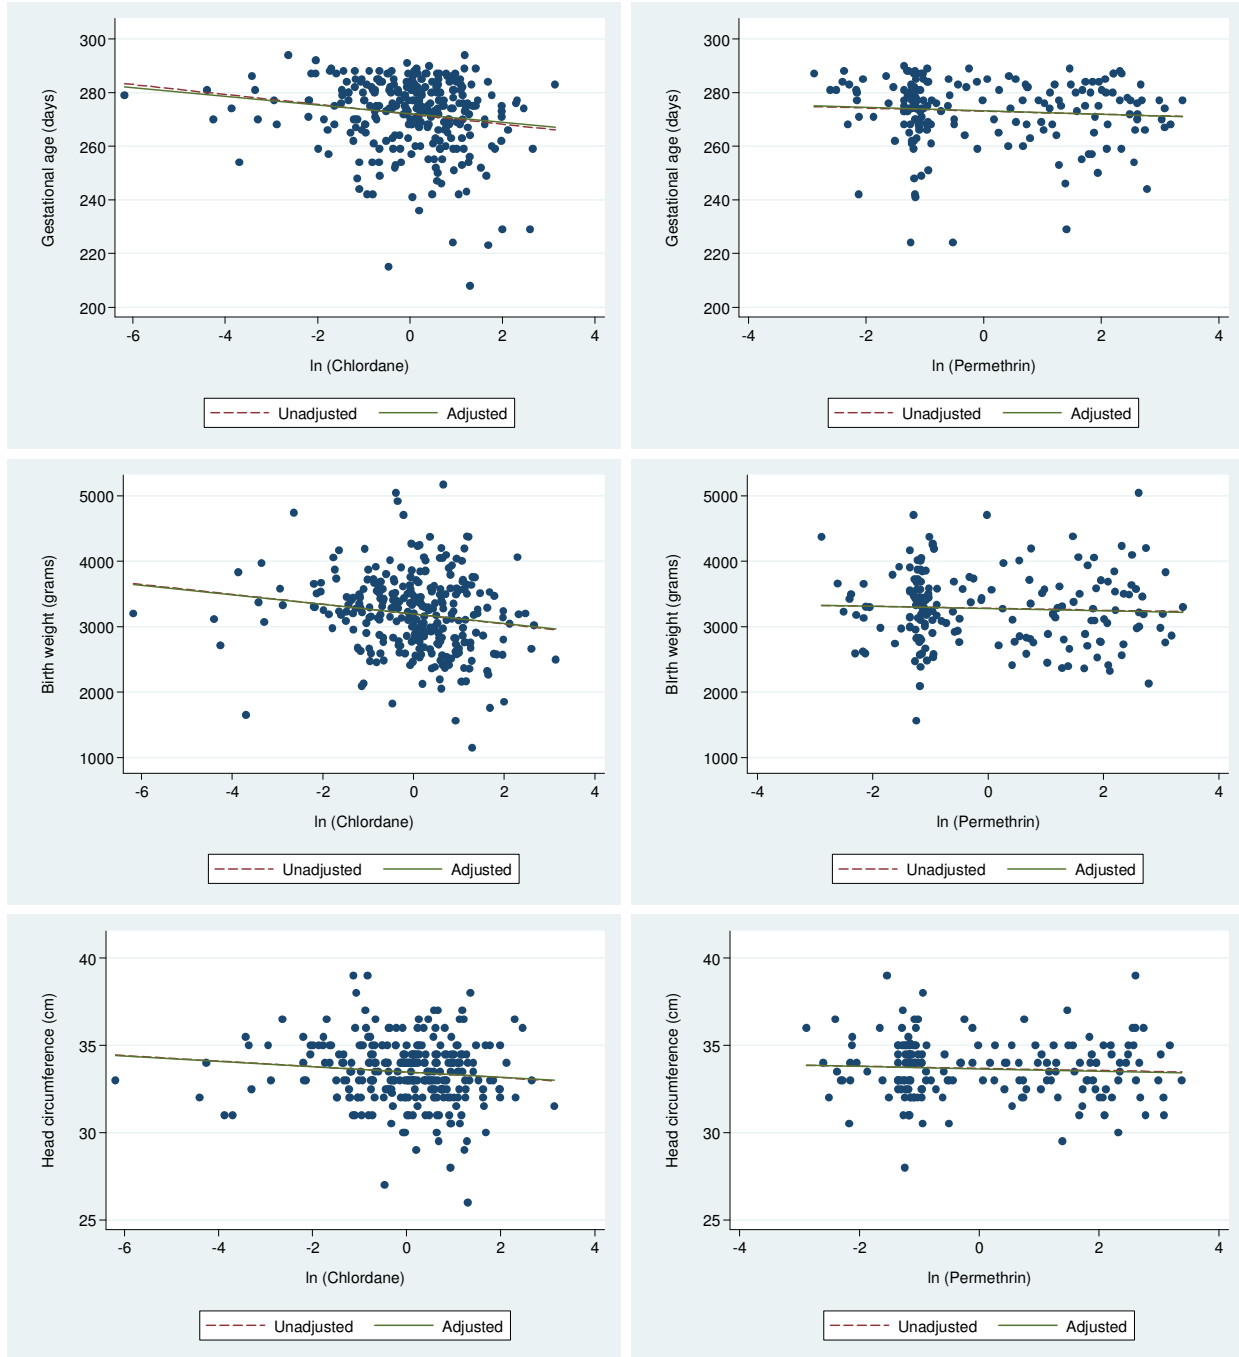

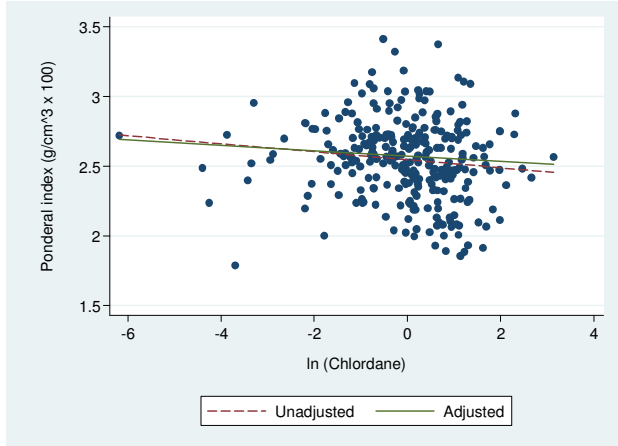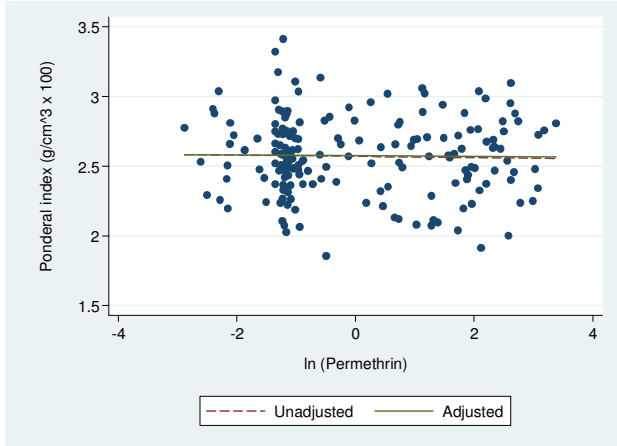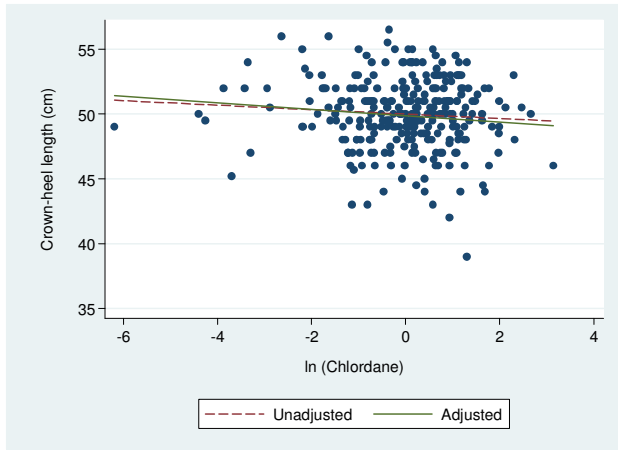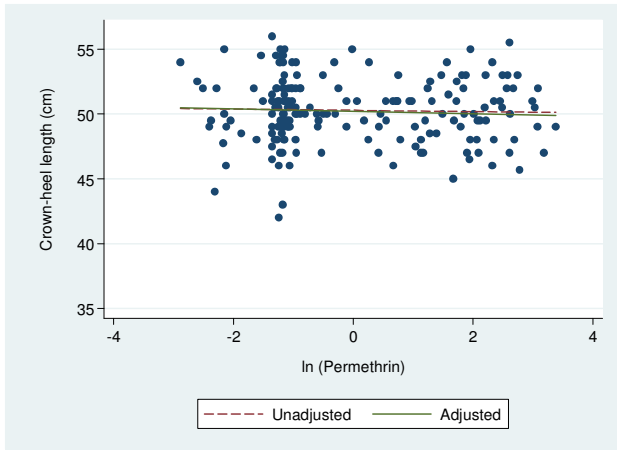

Figure S2: Unadjusted and adjusted linear predictions for anti-inflammatory, IL-1 $\beta$ , acute phase reaction, and other cytokine components with normalized chlordane and permethrin components

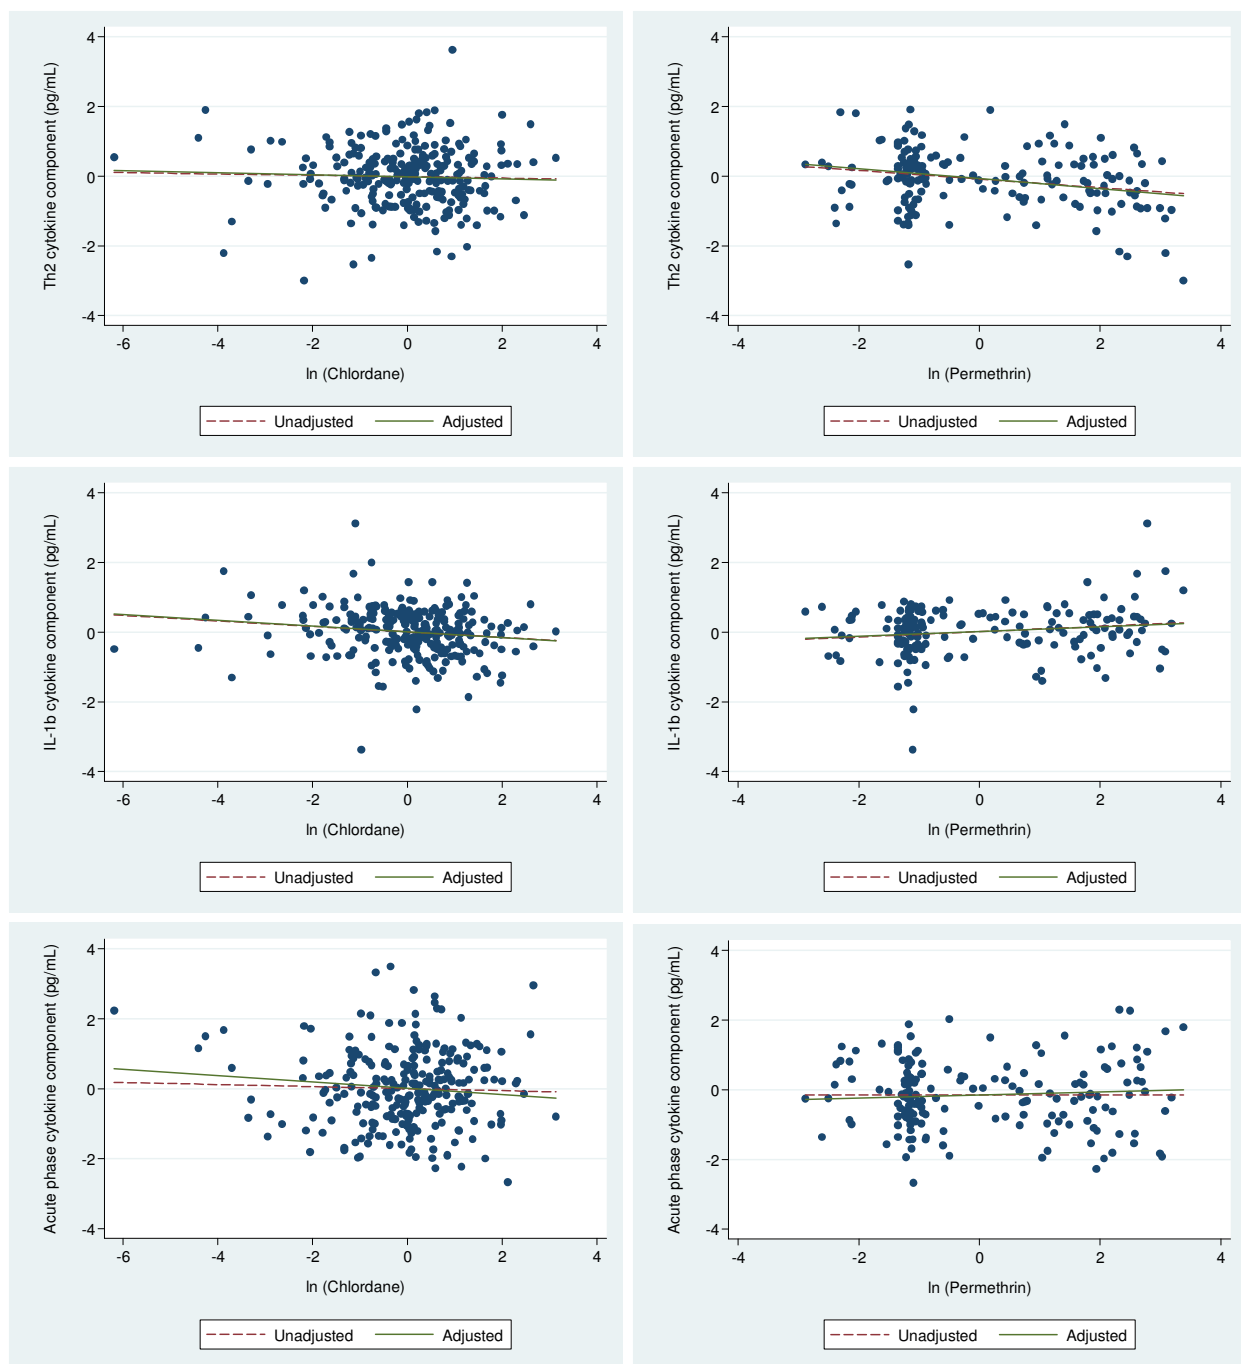

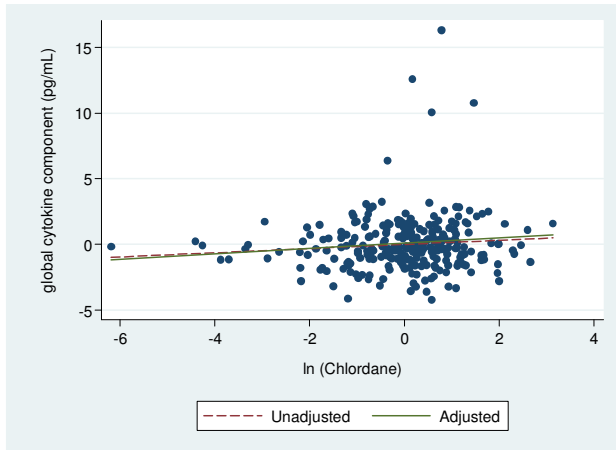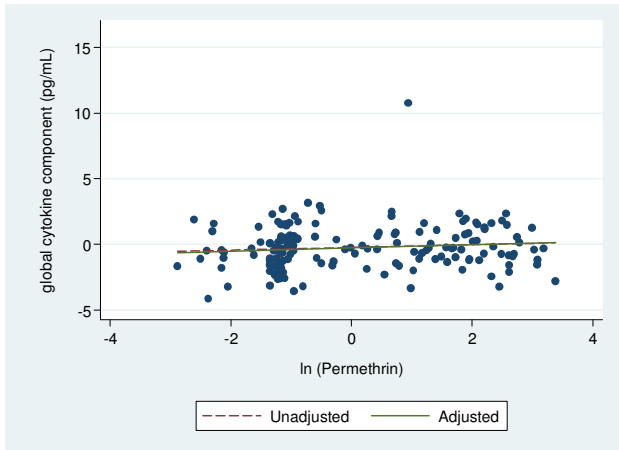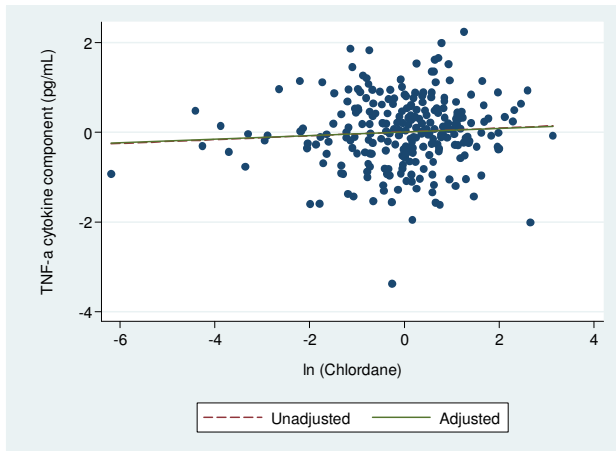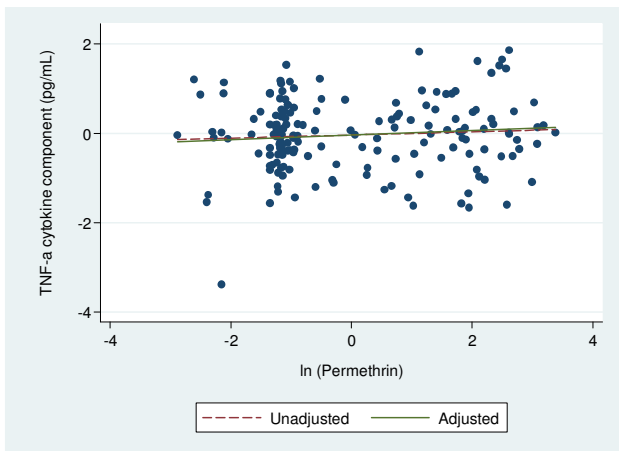

Supplement: NIHMS264942-supplement-1_si_001.pdf [file NIHMS264942-supplement-1_si_001.pdf]
